# Supplementary material for: 2,6-Diiminopiperidin-1-ol: an overlooked motif relevant to uranyl and transition metal binding on poly(amidoxime) adsorbents
Source: Royal Society of Chemistry journal article supplement (doi:10.1039/c6cc02488b), 2016-01-01
Supplement: c6cc02488b1.pdf [file c6cc02488b1.pdf]

Electronic Supporting Information for:

“2,6-diiminopiperidin-1-ol: an overlooked motif relevant to uranyl and transition metal binding on poly(amidoxime) adsorbents”

Zachary C. Kennedy, Allan Jay P. Cardenas, Jordan F. Corbey, and Marvin G. Warner\*

\*Pacific Northwest National Laboratory. 902 Battelle Blvd, Richland, WA 99354.

| <u>Table of Contents:</u>                                                                     | <u>Page</u> |
|-----------------------------------------------------------------------------------------------|-------------|
| Experimental Details.....                                                                     | 2           |
| Single Crystal X-ray Diffraction Data and Structure Refinement for Complexes <b>4-6</b> ..... | 4           |
| ESI-MS Data.....                                                                              | 11          |
| NMR Spectra .....                                                                             | 13          |
| UV Spectra for Complexes <b>5</b> and <b>6</b> .....                                          | 16          |
| References.....                                                                               | 16          |

## EXPERIMENTAL DETAILS

**Materials and methods.** All reagents were used as received from commercial sources (typically Sigma Aldrich, TCI, or Fisher Scientific). Deuterated solvents were obtained from Cambridge Isotopes. Nuclear magnetic resonance spectra were obtained using a Varian 500 MHz spectrometer. High resolution mass spectrometry was performed on an Agilent Technologies 6530 Accurate-Mass Q-ToF LC/MS with positive ionization. Standard ESI-L low concentration tuning mix with addition of 0.1 mM HP-0321 was used as calibrant. Calculations of mass spectra were obtained using the Isotope Distribution Calculator and Mass Spec Plotter program.<sup>1</sup> UV-visible spectra were obtained using an Agilent Technologies 8453 spectrophotometer. Elemental analysis was performed at Robertson Microlit Laboratories (Ledgewood, NJ, USA).

**glutardiamidoxime ( $\mathbf{H}_2\mathbf{L}^2$ ):** Synthesized as reported by Tian et al.<sup>2</sup> <sup>1</sup>H and <sup>13</sup>C-NMR shifts in DMSO-*d*<sub>6</sub> matched published values.<sup>3</sup> <sup>1</sup>H-NMR (500 MHz, DMSO-*d*<sub>6</sub>):  $\delta$  ppm 8.67 (s, 2H), 5.29 (s, 4H), 1.93 (t, 4H), 1.68 (quint, 2H). <sup>13</sup>C-NMR (126 MHz, DMSO-*d*<sub>6</sub>):  $\delta$  ppm 152.50, 30.31, 23.61.

**$\mathbf{H}_2\mathbf{L}^2 + \text{HCl}$  experiment:** A stock solution of HCl (diluted with D<sub>2</sub>O) of appropriate concentration was added to a stirring solution of ligand  $\mathbf{H}_2\mathbf{L}^2$  in DMSO-*d*<sub>6</sub>/D<sub>2</sub>O (90:10 v/v, total volume = 0.7 mL) in a scintillation vial to achieve a final [HCl] = 100 mM and [ $\mathbf{H}_2\mathbf{L}^2$ ] = 10 mM. The mixture was stirred at room temperature for 7 days and analyzed by NMR. <sup>1</sup>H-NMR (500 MHz, DMSO-*d*<sub>6</sub>/D<sub>2</sub>O (90:10 v/v)):  $\delta$  ppm 2.41 (t, 4H), 1.93 (quint, 2H). <sup>13</sup>C-NMR (500 MHz, DMSO-*d*<sub>6</sub>/D<sub>2</sub>O (90:10 v/v)):  $\delta$  ppm 162.19, 27.60, 24.21.

**(UO<sub>2</sub>)<sub>2</sub>( $\mathbf{H}_2\mathbf{L}^1$ )<sub>2</sub>( $\mu$ -O)<sub>2</sub>(NO<sub>3</sub>)<sub>2</sub>·THF (**4**):** Ligand  $\mathbf{H}_2\mathbf{L}^2$  (4.0 mg, 2.5 x 10<sup>-5</sup> mol) was dissolved in CH<sub>3</sub>OH (0.8 mL) in a 1 dram vial. UO<sub>2</sub>(NO<sub>3</sub>)<sub>2</sub>·6H<sub>2</sub>O (18.4 mg, 3.7 x 10<sup>-5</sup> mol) was then added resulting in a rapid (seconds) colour change from colourless to bright orange. Vapour diffusion of tetrahydrofuran into the mixture afforded **4** after 10 days as irregular yellow crystals suitable for X-ray diffraction analysis.

**[Cu<sub>3</sub>( $\mathbf{H}_2\mathbf{L}^1$ )<sub>3</sub>( $\mu$ -O)<sub>3</sub>(H<sub>2</sub>O)<sub>3</sub>](NO<sub>3</sub>)<sub>3</sub> (**5**):** Ligand  $\mathbf{H}_2\mathbf{L}^2$  (26.9 mg, 1.7 x 10<sup>-4</sup> mol) was dissolved in CH<sub>3</sub>OH/H<sub>2</sub>O (1:1, 2 mL total). Cu(NO<sub>3</sub>)<sub>2</sub>·3H<sub>2</sub>O (84.8 mg, 3.5 x 10<sup>-4</sup> mol) was then added to the vial resulting in a colour change from colourless to dark yellow within seconds and eventually green (after ~1 h). After 24 hrs the solution was diluted with acetone (20 mL) and cooled to 0 °C resulting in a precipitate which was isolated by filtration, washed copiously with acetone and air-dried to yield crude **5** as a blue-green powder (25.2 mg, 56 %).

**Growth of single crystals:** Ligand  $\mathbf{H}_2\mathbf{L}^2$  (3.8 mg, 2.4 x 10<sup>-5</sup> mol) was dissolved in CH<sub>3</sub>OH/H<sub>2</sub>O (1:1, 0.5 mL total) in a 1 dram vial. Cu(NO<sub>3</sub>)<sub>2</sub>·3H<sub>2</sub>O (12.0 mg, 5.0 x 10<sup>-5</sup> mol) was then added to the vial. Vapour diffusion of acetone into the mixture afforded **5** after 4 days as dark green blocks suitable for X-ray diffraction analysis. <sup>1</sup>H-NMR (500 MHz, DMSO-*d*<sub>6</sub>):  $\delta$  ppm 38.59 (br s, 2H), 14.75 (br s, 2H), -1.33 (br s, 4H). HRMS (ESI-TOF) *m/z*: [[Cu<sub>3</sub>( $\mathbf{HL}^1$ )<sub>3</sub>( $\mu$ -O)<sub>3</sub>]+H]<sup>+</sup> Calcd for C<sub>15</sub>H<sub>22</sub>N<sub>9</sub>O<sub>3</sub>Cu<sub>3</sub>: 566.9716; found: 566.9719, [[Cu<sub>3</sub>( $\mathbf{H}_2\mathbf{L}^1$ )<sub>2</sub>( $\mathbf{HL}^1$ )( $\mu$ -O)<sub>3</sub>]+NO<sub>3</sub>]<sup>+</sup> Calcd for C<sub>15</sub>H<sub>23</sub>N<sub>10</sub>O<sub>6</sub>Cu<sub>3</sub>: 629.9672; found: 629.9667. [[Cu<sub>3</sub>( $\mathbf{H}_2\mathbf{L}^1$ )<sub>2</sub>( $\mathbf{HL}^1$ )( $\mu$ -O)<sub>3</sub>+HCO<sub>2</sub>H+NO<sub>3</sub>]<sup>+</sup> Calcd

for  $C_{16}H_{25}N_{10}O_8Cu_3$ : 675.9727; found: 675.9720. Anal. Calcd. for  $C_{30}H_{61}N_{23}O_{28}Cu_6$ : C, 22.90%; H, 3.91%; N, 20.48%. Found: C, 22.97%; H, 3.67%; N, 20.11%.

$[Ni_3(H_2L^1)_3(\mu-O)_3(H_2O)_6]Cl_3$  (**6**): Ligand  $H_2L^2$  (4.5 mg,  $2.8 \times 10^{-5}$  mol) was dissolved in  $CH_3OH/H_2O$  (1:1, 0.5 mL total) in a 1 dram vial.  $Ni(NO_3)_2 \cdot 6H_2O$  (11.1 mg,  $3.8 \times 10^{-5}$  mol) was then added resulting in no observable colour change in solution. Vapour diffusion of acetone into the mixture afforded pale blue polycrystalline needles observed after 7 days. The mother liquor was removed and the crystals were washed with acetone and air-dried. Recrystallization was performed using a second acetone vapour diffusion process using the same conditions as during the initial crystallization to yield pale blue single crystalline rods of **6** suitable for X-ray diffraction analysis. HRMS (ESI-TOF) m/z:  $[Ni_2(H_2L^1)_2(HL^1)(\mu-O)_3+H^+]$  Calcd for  $C_{15}H_{24}Ni_2N_9O_3$ : 494.0709; found: 494.0661.  $[Ni(H_2L^1)_2(\mu-O)_2+H^+]$ : Calcd for  $C_{10}H_{17}NiN_6O_2$ : 311.0767; found: 311.0730. Notes: Chloride counter ions are thought to arise from residual NaCl present in  $H_2L^2$  starting material. While XRD, ESI-MS (Fig. S7), and UV analyses have been performed, conditions to isolate larger quantities of **6** have remained elusive, precluding further analysis by NMR and elemental analysis.

## SINGLE CRYSTAL X-RAY DIFFRACTION DATA AND STRUCTURE REFINEMENT

Single crystals of **5** and **6** were selected and mounted on a Bruker-APEXII-CCD diffractometer. The crystals were kept at 100 K during data collection. Using Olex2,<sup>4</sup> structures **5** and **6** were solved with the ShelXS<sup>5</sup> structure solution program using direct methods and refined with the olex2.refine<sup>6</sup> refinement package using Gauss-Newton minimisation.

A single crystal of **4** was mounted in a radiological fume hood on a MiTeGen MicroMounts<sup>®</sup> loop using Krytox<sup>®</sup> grease which was then encapsulated with a polyester tubing epoxied to the pin base and transferred to a Bruker D8 VENTURE diffractometer. Data was collected at room temperature. The initial unit cell was determined using the APEX2<sup>7</sup> program package. Data integration was performed using SAINT<sup>8</sup> and SADABS<sup>9</sup> was used to determine the semi-empirical absorption correction. A numerical absorption correction using face-indexing was not implemented due to the difficulty in identifying the crystal faces through the polyester tubing. Subsequent data reduction, structure solution and refinement were carried out using the SHELXTL<sup>10</sup> program. The structure was solved by direct methods and refined on F<sup>2</sup> by full-matrix least-squares techniques.

The structure of **4** is located about an inversion center, and there is a disordered tetrahydrofuran molecule of solvation in the asymmetric unit. C(3) was disordered and included using multiple components with partial site-occupancy-factors and isotropic thermal parameters. Hydrogen atoms were included using a riding model.

**Table S1. Crystal data and structure refinement for complexes 4-6**

| Identification code                         | 4                                                                             | 5                                                                               | 6                                                                                              |
|---------------------------------------------|-------------------------------------------------------------------------------|---------------------------------------------------------------------------------|------------------------------------------------------------------------------------------------|
| Empirical formula                           | C <sub>18</sub> H <sub>32</sub> N <sub>8</sub> O <sub>14</sub> U <sub>2</sub> | C <sub>15</sub> H <sub>32</sub> Cu <sub>3</sub> N <sub>12</sub> O <sub>16</sub> | C <sub>15</sub> H <sub>44</sub> Cl <sub>3</sub> N <sub>9</sub> Ni <sub>3</sub> O <sub>13</sub> |
| Formula weight                              | 1060.57                                                                       | 827.13                                                                          | 841.07                                                                                         |
| Temperature/K                               | 296                                                                           | 100                                                                             | 100                                                                                            |
| Crystal system                              | Monoclinic                                                                    | triclinic                                                                       | Monoclinic                                                                                     |
| Space group                                 | P 2 <sub>1</sub> /n                                                           | P-1                                                                             | P 2 <sub>1</sub> /c                                                                            |
| a/Å                                         | 8.3529(4)                                                                     | 12.6421(9)                                                                      | 17.1605(12)                                                                                    |
| b/Å                                         | 21.2854(8)                                                                    | 14.2612(10)                                                                     | 13.4761(10)                                                                                    |
| c/Å                                         | 8.9198(4)                                                                     | 17.0125(11)                                                                     | 14.8097(11)                                                                                    |
| α/°                                         | 90.00                                                                         | 90.192(3)                                                                       | 90.00                                                                                          |
| β/°                                         | 111.8841(15)                                                                  | 96.380(3)                                                                       | 111.774(4)                                                                                     |
| γ/°                                         | 90.00                                                                         | 113.941(3)                                                                      | 90.00                                                                                          |
| Volume/Å <sup>3</sup>                       | 1471.61(11)                                                                   | 2782.0(3)                                                                       | 3180.5(4)                                                                                      |
| Z                                           | 2                                                                             | 4                                                                               | 4                                                                                              |
| ρ <sub>calc</sub> /g/cm <sup>3</sup>        | 2.393                                                                         | 1.9747                                                                          | 1.757                                                                                          |
| μ/mm <sup>-1</sup>                          | 11.068                                                                        | 2.371                                                                           | 2.081                                                                                          |
| F(000)                                      | 984.0                                                                         | 1688.9                                                                          | 1744.0                                                                                         |
| Crystal size/mm <sup>3</sup>                | 0.50 × 0.32 × 0.24                                                            | 0.34 × 0.28 × 0.24                                                              | 0.40 × 0.26 × 0.12                                                                             |
| Radiation                                   | Mo Kα (λ = 0.71073)                                                           | Mo Kα (λ = 0.71073)                                                             | Mo Kα (λ = 0.71073)                                                                            |
| 2θ range for data collection/°              | 3.01 to 28.57                                                                 | 3.12 to 56.74                                                                   | 3.96 to 56.8                                                                                   |
| Index ranges                                | -11 ≤ h ≤ 11, -28 ≤ k ≤ 28, -11 ≤ l ≤ 11                                      | -16 ≤ h ≤ 16, -19 ≤ k ≤ 19, -22 ≤ l ≤ 17                                        | -22 ≤ h ≤ 22, -18 ≤ k ≤ 17, -19 ≤ l ≤ 19                                                       |
| Reflections collected                       | 62272                                                                         | 50230                                                                           | 32907                                                                                          |
| Independent reflections                     | 3673                                                                          | 13844                                                                           | 7953                                                                                           |
| Data/restraints/parameters                  | 3673/0/184                                                                    | 13844/8/903                                                                     | 7953/7/453                                                                                     |
| Goodness-of-fit on F <sup>2</sup>           | 1.210                                                                         | 1.062                                                                           | 1.027                                                                                          |
| Final R indexes [I >= 2σ(I)]                | R <sub>1</sub> = 0.0336, wR <sub>2</sub> = 0.0759                             | R <sub>1</sub> = 0.0273, wR <sub>2</sub> = 0.0651                               | R <sub>1</sub> = 0.0294, wR <sub>2</sub> = 0.0733                                              |
| Final R indexes [all data]                  | R <sub>1</sub> = 0.0375, wR <sub>2</sub> = 0.0778                             | R <sub>1</sub> = 0.0364, wR <sub>2</sub> = 0.0710                               | R <sub>1</sub> = 0.0351, wR <sub>2</sub> = 0.0765                                              |
| Largest diff. peak/hole / e Å <sup>-3</sup> | 0.97/-2.66                                                                    | 1.17/-0.93                                                                      | 1.37/-0.92                                                                                     |

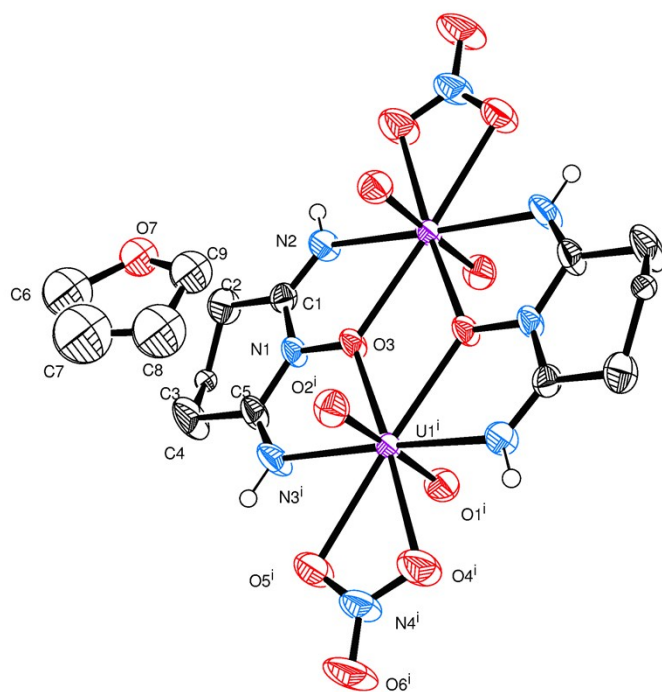

**Figure S1.** Crystal structure of complex **4** shown as thermal ellipsoids at 50% probability. Aliphatic hydrogen atoms omitted for clarity.

**Table S2. Bond Length and Interatomic Distances for 4.**

| Atom | Atom            | Length/Å | Atom | Atom            | Length/Å  |
|------|-----------------|----------|------|-----------------|-----------|
| U1   | O2              | 1.759(4) | C1   | C2              | 1.501(8)  |
| U1   | O1              | 1.766(4) | C2   | C3A             | 1.479(17) |
| U1   | O3              | 2.464(4) | C2   | C3              | 1.500(13) |
| U1   | O3 <sup>1</sup> | 2.468(4) | C3   | C4              | 1.554(14) |
| U1   | N3              | 2.480(5) | C3A  | C4              | 1.318(18) |
| U1   | N2              | 2.493(5) | C4   | C5              | 1.507(8)  |
| U1   | O4              | 2.519(5) | C5   | N3 <sup>1</sup> | 1.273(8)  |
| U1   | O5              | 2.546(5) | O7   | C9              | 1.36(2)   |
| U1   | N4              | 2.970(5) | O7   | C6              | 1.51(2)   |
| N1   | C5              | 1.358(8) | C6   | C7              | 1.18(4)   |
| N1   | C1              | 1.363(7) | C7   | C8              | 1.34(4)   |
| N1   | O3              | 1.393(5) | C8   | C9              | 1.37(4)   |
| N2   | C1              | 1.259(8) | O7A  | C6A             | 1.34(2)   |
| N3   | C5 <sup>1</sup> | 1.273(8) | O7A  | C9A             | 1.45(2)   |
| N4   | O6              | 1.216(7) | C6A  | C7A             | 1.52(3)   |
| N4   | O4              | 1.256(8) | C7A  | C8A             | 1.50(3)   |
| N4   | O5              | 1.259(8) | C8A  | C9A             | 1.50(3)   |
| O3   | U1 <sup>1</sup> | 2.468(4) |      |                 |           |

<sup>1</sup>-X,-Y,-Z

**Table S3. Bond Angles for 4.**

| Atom            | Atom | Atom            | Angle/°    | Atom            | Atom | Atom            | Angle/°    |
|-----------------|------|-----------------|------------|-----------------|------|-----------------|------------|
| O2              | U1   | O1              | 177.9(2)   | C5              | N1   | O3              | 116.2(4)   |
| O2              | U1   | O3              | 91.07(18)  | C1              | N1   | O3              | 116.7(4)   |
| O1              | U1   | O3              | 90.59(18)  | C1              | N2   | U1              | 124.5(4)   |
| O2              | U1   | O3 <sup>1</sup> | 91.76(19)  | C5 <sup>1</sup> | N3   | U1              | 124.5(4)   |
| O1              | U1   | O3 <sup>1</sup> | 90.23(19)  | O6              | N4   | O4              | 121.8(6)   |
| O3              | U1   | O3 <sup>1</sup> | 60.67(14)  | O6              | N4   | O5              | 122.7(6)   |
| O2              | U1   | N3              | 89.1(2)    | O4              | N4   | O5              | 115.5(5)   |
| O1              | U1   | N3              | 91.1(2)    | O6              | N4   | U1              | 178.6(6)   |
| O3              | U1   | N3              | 122.61(15) | O4              | N4   | U1              | 57.1(3)    |
| O3 <sup>1</sup> | U1   | N3              | 61.96(15)  | O5              | N4   | U1              | 58.3(3)    |
| O2              | U1   | N2              | 86.8(2)    | N1              | O3   | U1              | 120.2(3)   |
| O1              | U1   | N2              | 92.7(2)    | N1              | O3   | U1 <sup>1</sup> | 120.4(3)   |
| O3              | U1   | N2              | 62.04(15)  | U1              | O3   | U1 <sup>1</sup> | 119.33(14) |
| O3 <sup>1</sup> | U1   | N2              | 122.65(14) | N4              | O4   | U1              | 98.1(4)    |
| N3              | U1   | N2              | 173.94(19) | N4              | O5   | U1              | 96.7(4)    |
| O2              | U1   | O4              | 92.1(2)    | N2              | C1   | N1              | 116.6(5)   |
| O1              | U1   | O4              | 85.8(2)    | N2              | C1   | C2              | 126.0(6)   |
| O3              | U1   | O4              | 125.14(15) | N1              | C1   | C2              | 117.4(5)   |
| O3 <sup>1</sup> | U1   | O4              | 172.93(16) | C3A             | C2   | C1              | 114.0(8)   |
| N3              | U1   | O4              | 112.19(18) | C3              | C2   | C1              | 113.0(6)   |
| N2              | U1   | O4              | 63.50(17)  | C2              | C3   | C4              | 107.8(8)   |
| O2              | U1   | O5              | 87.7(2)    | C4              | C3A  | C2              | 123.6(13)  |
| O1              | U1   | O5              | 90.5(2)    | C3A             | C4   | C5              | 117.3(9)   |
| O3              | U1   | O5              | 174.57(14) | C5              | C4   | C3              | 110.9(7)   |
| O3 <sup>1</sup> | U1   | O5              | 124.64(14) | N3 <sup>1</sup> | C5   | N1              | 116.7(5)   |
| N3              | U1   | O5              | 62.68(17)  | N3 <sup>1</sup> | C5   | C4              | 126.8(6)   |
| N2              | U1   | O5              | 112.60(16) | N1              | C5   | C4              | 116.5(6)   |
| O4              | U1   | O5              | 49.66(17)  | C9              | O7   | C6              | 102.3(15)  |
| O2              | U1   | N4              | 90.3(2)    | C7              | C6   | O7              | 109(2)     |
| O1              | U1   | N4              | 87.6(2)    | C6              | C7   | C8              | 110(3)     |
| O3              | U1   | N4              | 149.90(15) | C7              | C8   | C9              | 111(3)     |
| O3 <sup>1</sup> | U1   | N4              | 149.32(15) | O7              | C9   | C8              | 104(2)     |
| N3              | U1   | N4              | 87.48(17)  | C6A             | O7A  | C9A             | 109.7(15)  |
| N2              | U1   | N4              | 88.03(17)  | O7A             | C6A  | C7A             | 109.2(16)  |
| O4              | U1   | N4              | 24.76(17)  | C8A             | C7A  | C6A             | 108.1(17)  |
| O5              | U1   | N4              | 24.91(16)  | C9A             | C8A  | C7A             | 101.8(17)  |
| C5              | N1   | C1              | 127.1(5)   | O7A             | C9A  | C8A             | 111.0(16)  |

<sup>1</sup>-X,-Y,-Z

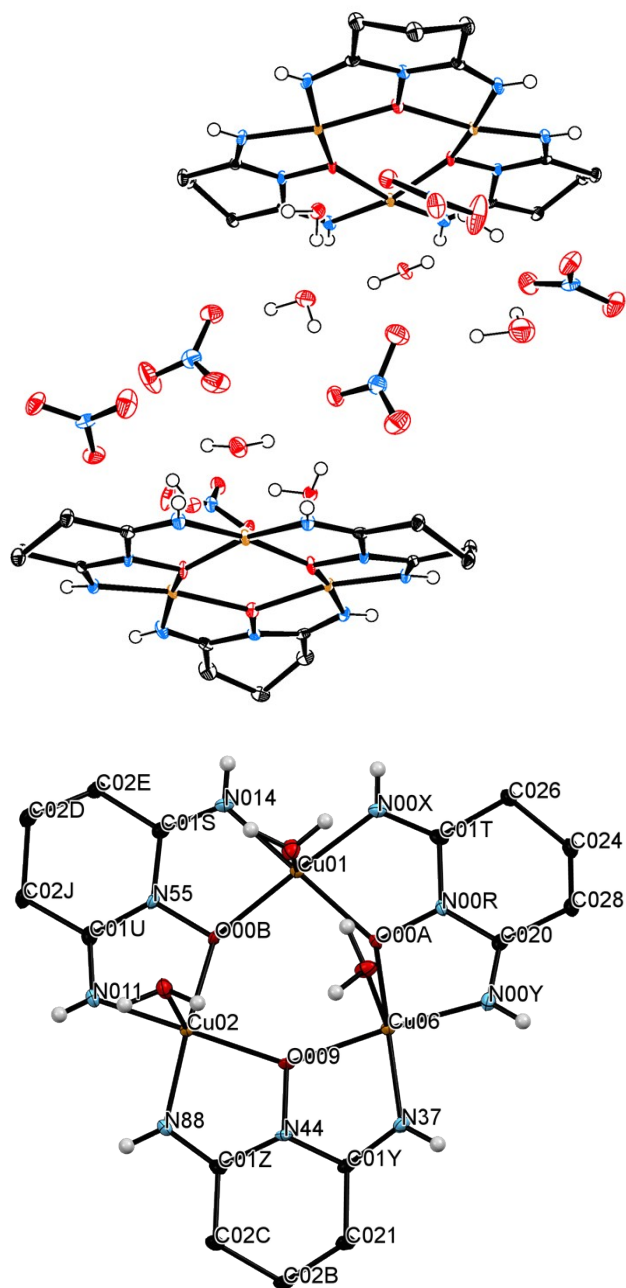

**Figure S2.** Full crystal structure (top) of complex **5** shown as thermal ellipsoids at 50% probability and crystal formula unit with atom labels (bottom). Copper atoms labeled tan, nitrogen atoms labeled blue, and oxygen atoms labeled red. Aliphatic hydrogen atoms omitted.

**Table S4. Selected Bond Lengths for 5.**

| Atom1 | Atom2 | Length/Å | Atom1 | Atom2 | Length/Å |
|-------|-------|----------|-------|-------|----------|
| Cu01  | O00A  | 2.004(1) | N00Y  | C020  | 1.280(2) |
| Cu01  | O00B  | 1.991(1) | N011  | C01U  | 1.278(2) |



|      |      |          |      |      |          |
|------|------|----------|------|------|----------|
| Cu01 | O00H | 2.283(2) | N014 | C01S | 1.282(2) |
| Cu01 | N00X | 1.921(2) | N55  | C01S | 1.371(2) |
| Cu01 | N014 | 1.935(2) | N55  | C01U | 1.369(2) |
| Cu02 | O009 | 2.000(1) | N44  | C01Y | 1.373(2) |
| Cu02 | O00B | 1.980(1) | N44  | C01Z | 1.370(2) |
| Cu02 | O00D | 2.366(2) | N37  | C01Y | 1.278(2) |
| Cu02 | N011 | 1.939(2) | N88  | C01Z | 1.283(3) |
| Cu02 | N88  | 1.938(2) | C01S | C02E | 1.500(3) |
| Cu06 | O009 | 2.026(1) | C01T | C026 | 1.499(3) |
| Cu06 | O00A | 1.967(1) | C01U | C02J | 1.503(3) |
| Cu06 | O00G | 2.266(2) | C01Y | C021 | 1.500(2) |
| Cu06 | N00Y | 1.955(2) | C01Z | C02C | 1.497(2) |
| Cu06 | N37  | 1.921(2) | C020 | C028 | 1.503(3) |
| O009 | N44  | 1.400(2) | C021 | C02B | 1.524(3) |
| O00A | N00R | 1.401(2) | C024 | C026 | 1.526(3) |
| O00B | N55  | 1.407(2) | C024 | C028 | 1.516(3) |
| N00R | C01T | 1.370(2) | C02B | C02C | 1.525(3) |
| N00R | C020 | 1.376(2) | C02D | C02E | 1.521(3) |
| N00X | C01T | 1.276(3) | C02D | C02J | 1.528(3) |

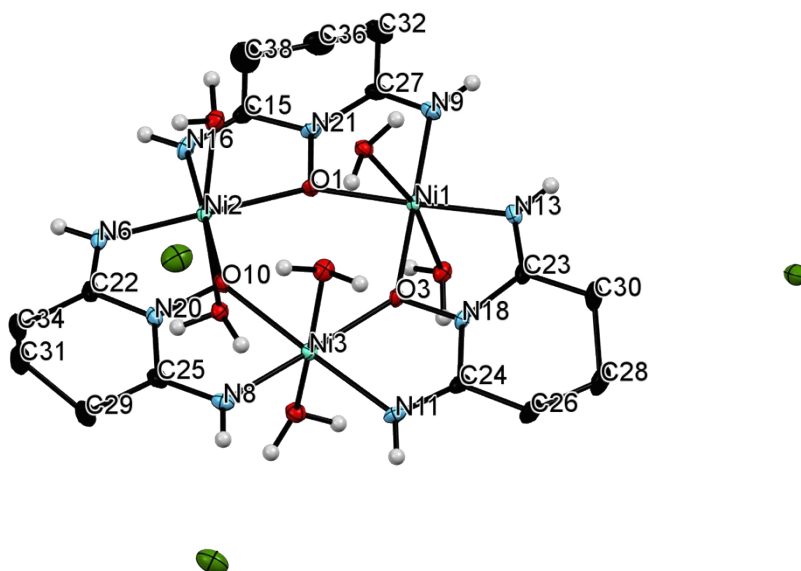

**Figure S3.** Crystal structure of complex **6** shown as thermal ellipsoids at 50% probability. Nickel atoms labeled aqua, nitrogen atoms labeled blue, oxygen atoms labeled red, and chloride counter ions labeled green. Aliphatic hydrogen atoms omitted.

**Table S5. Selected Bond Lengths for 6.**

| Atom | Atom | Length/Å | Atom | Atom | Length/Å |
|------|------|----------|------|------|----------|
| Ni1  | O1   | 2.021(2) | O10  | N20  | 1.393(3) |
| Ni1  | O3   | 2.033(2) | N11  | C24  | 1.284(3) |
| Ni1  | O5   | 2.219(1) | N13  | C23  | 1.276(3) |
| Ni1  | N9   | 2.005(2) | C15  | N16  | 1.282(4) |
| Ni1  | O12  | 2.103(1) | C15  | N21  | 1.370(3) |
| Ni1  | N13  | 1.995(2) | C15  | C38  | 1.485(4) |
| Ni2  | O1   | 2.019(2) | N18  | C23  | 1.378(3) |
| Ni2  | O2   | 2.163(1) | N18  | C24  | 1.364(3) |
| Ni2  | N6   | 1.994(2) | N20  | C22  | 1.373(3) |
| Ni2  | O10  | 2.065(1) | N20  | C25  | 1.372(3) |
| Ni2  | O14  | 2.128(1) | N21  | C27  | 1.371(3) |
| Ni2  | N16  | 2.004(2) | C22  | C34  | 1.502(4) |
| Ni3  | O3   | 2.021(2) | C23  | C30  | 1.498(3) |
| Ni3  | O4   | 2.138(1) | C24  | C26  | 1.495(3) |
| Ni3  | O7   | 2.200(1) | C25  | C29  | 1.501(4) |
| Ni3  | N8   | 1.993(2) | C26  | C28  | 1.530(4) |
| Ni3  | O10  | 2.067(1) | C27  | C32  | 1.498(3) |
| Ni3  | N11  | 2.007(2) | C28  | C30  | 1.518(3) |
| O1   | N21  | 1.385(2) | C29  | C31  | 1.518(4) |
| O3   | N18  | 1.387(2) | C31  | C34  | 1.508(3) |
| N6   | C22  | 1.278(3) | C32  | C36  | 1.503(5) |
| N8   | C25  | 1.277(3) | C36  | C38  | 1.445(7) |
| N9   | C27  | 1.284(3) |      |      |          |

## ESI-MS DATA

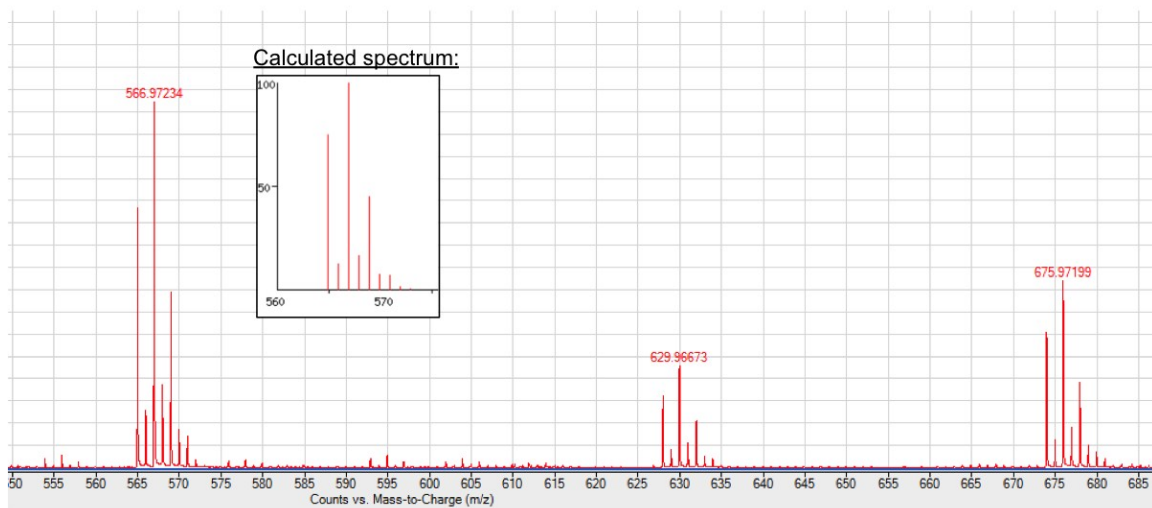

**Figure S4.** ESI-MS spectrum of complex **5** dissolved in H<sub>2</sub>O with calculated mass spectrum for  $[[\text{Cu}_3(\text{HL}^1)_3(\mu\text{-O})_3]\text{H}]^+$  at  $m/z = 567$  (inset).

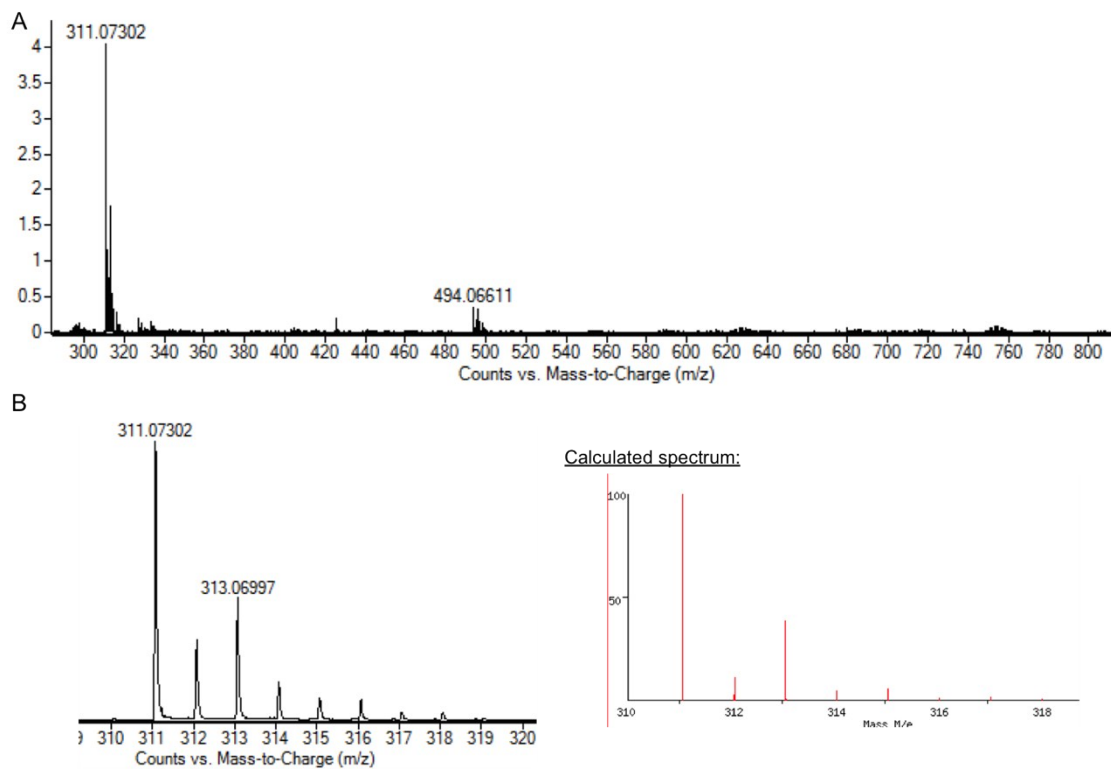

**Figure S5.** (A) ESI-MS spectrum of complex **6** dissolved in H<sub>2</sub>O. (B) Zoom of isotopic pattern for [Ni(H<sub>2</sub>L<sup>1</sup>)<sub>2</sub>(μ-O)<sub>2</sub>+H]<sup>+</sup> at m/z = 311 (left) and calculated pattern in this region (right)

## NMR Spectra

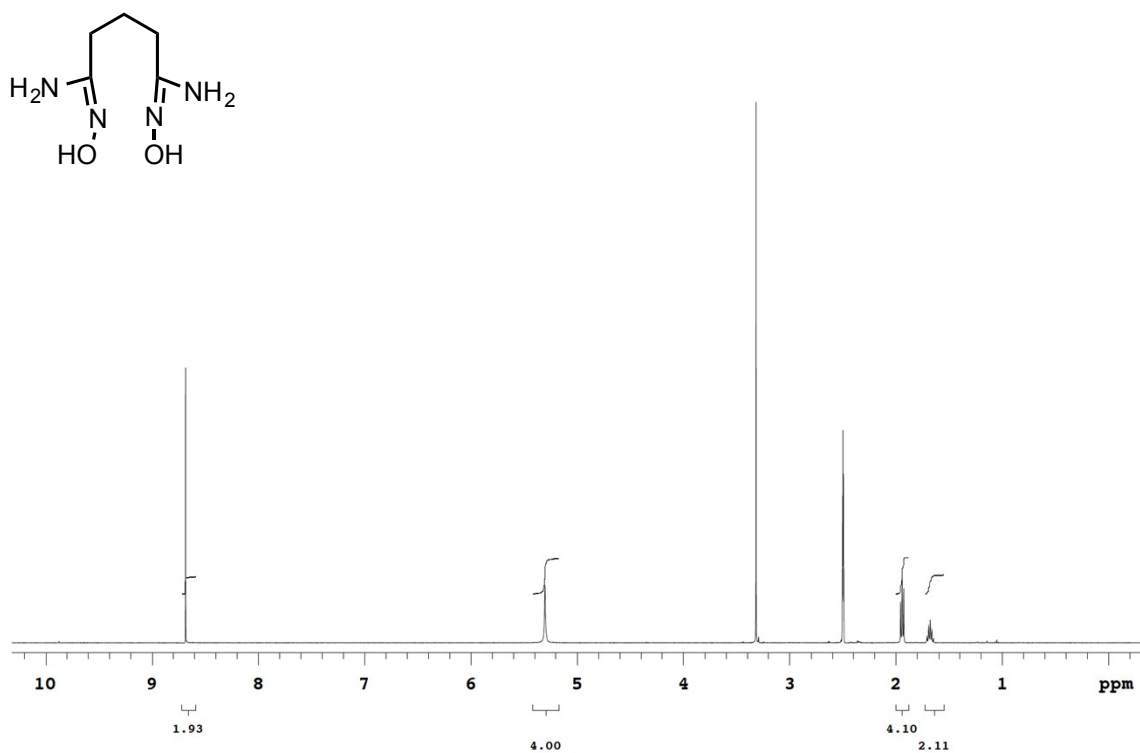

Figure S6.  $^1\text{H-NMR}$  spectrum of  $\text{H}_2\text{L}^2$  in  $\text{DMSO-d}_6$  recorded at 500 MHz.

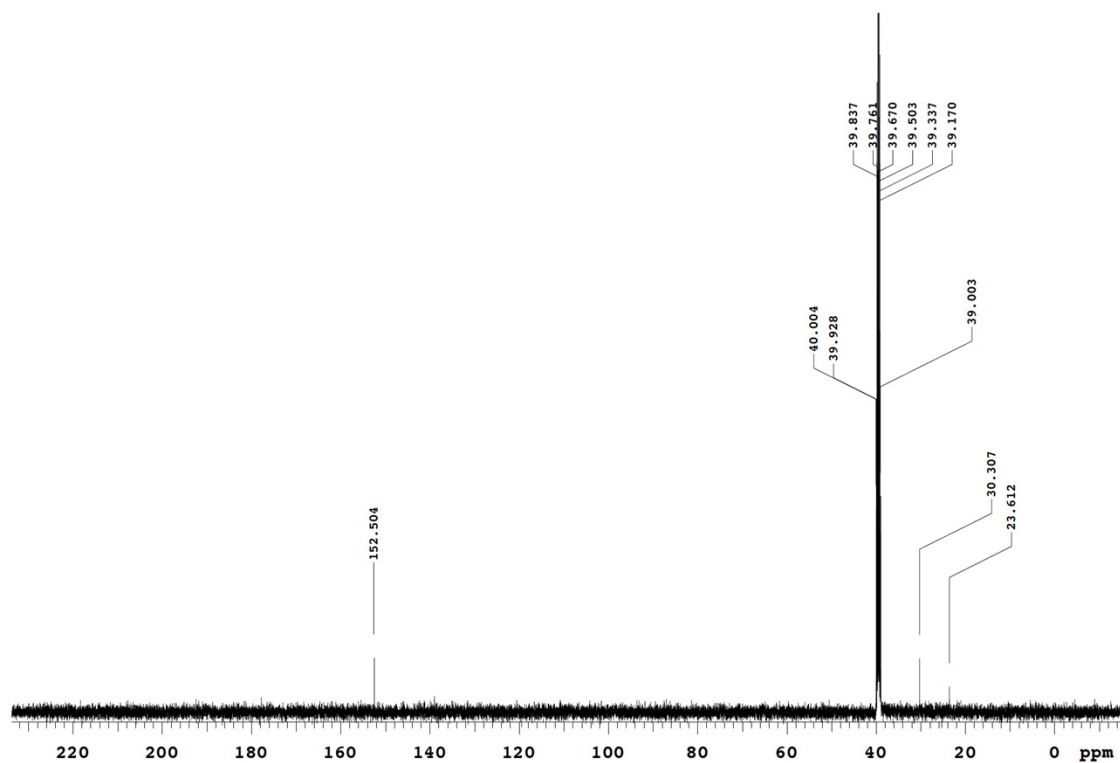

Figure S7.  $^{13}\text{C-NMR}$  spectrum of  $\text{H}_2\text{L}^2$  in  $\text{DMSO-d}_6$  recorded at 500 MHz.

$\text{H}_2\text{L}^2$  (10 mM) + HCl (100 mM) experiment

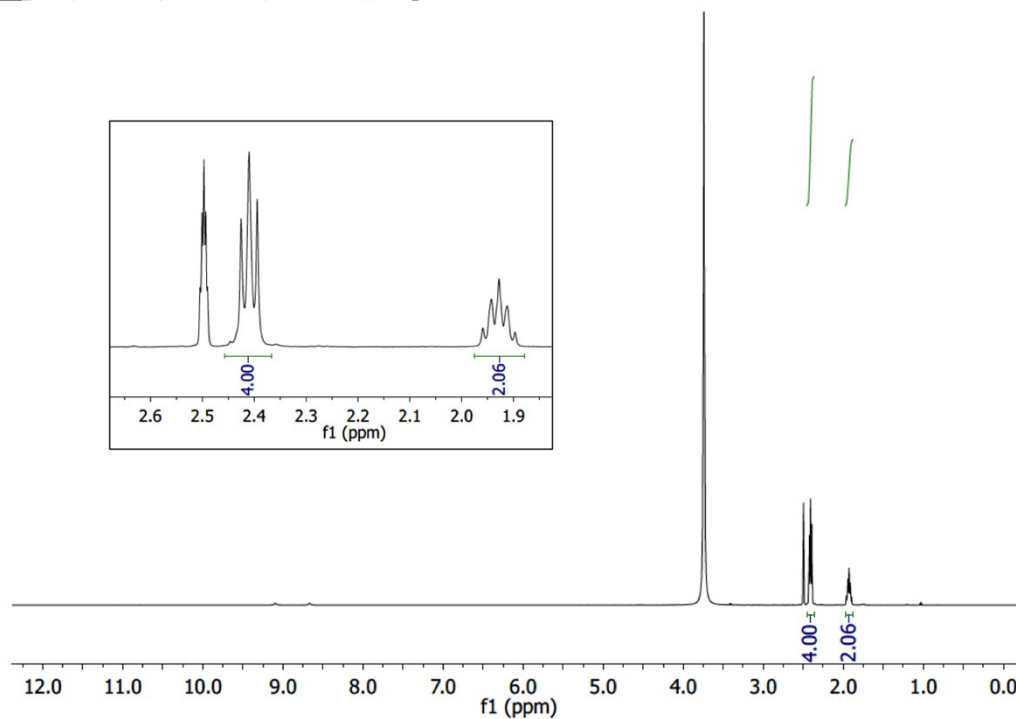

**Figure S8.**  $^1\text{H}$ -NMR spectrum of  $\text{H}_2\text{L}^2$  (10 mM) + HCl (100 mM) in 90%  $\text{DMSO-d}_6$  / 10%  $\text{H}_2\text{O}$  recorded after 7 days at 500 MHz with zoom of upfield region (inset).

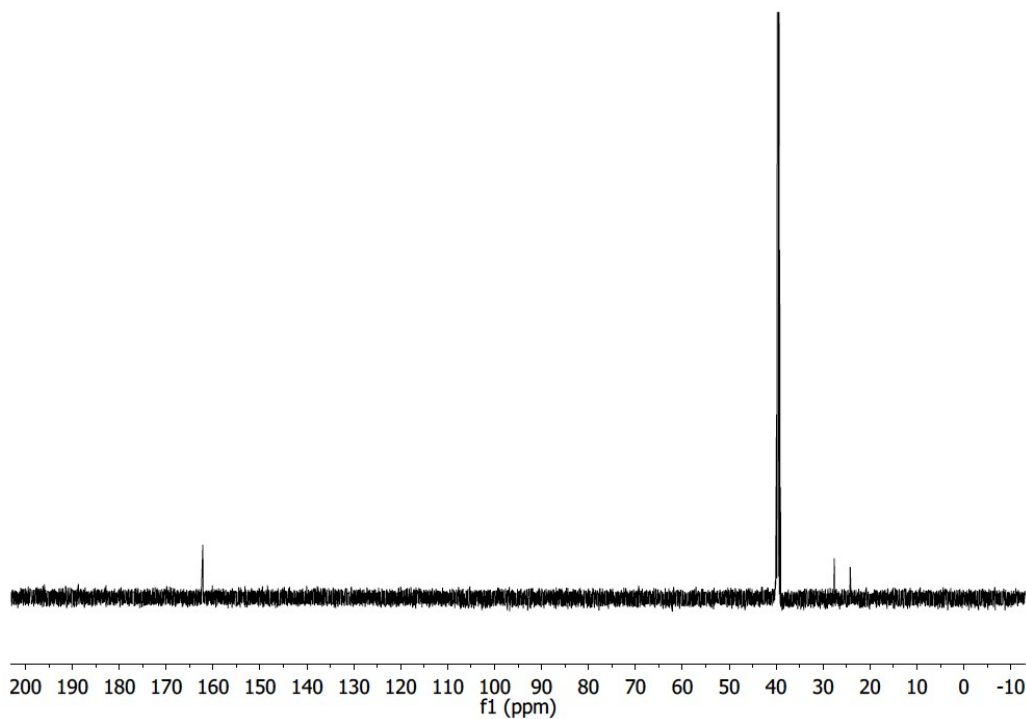

**Figure S9.**  $^{13}\text{C}$ -NMR spectrum of  $\text{H}_2\text{L}^2$  (10 mM) + HCl (100 mM) in 90%  $\text{DMSO-d}_6$  / 10%  $\text{H}_2\text{O}$  recorded after 7 days at 500 MHz.

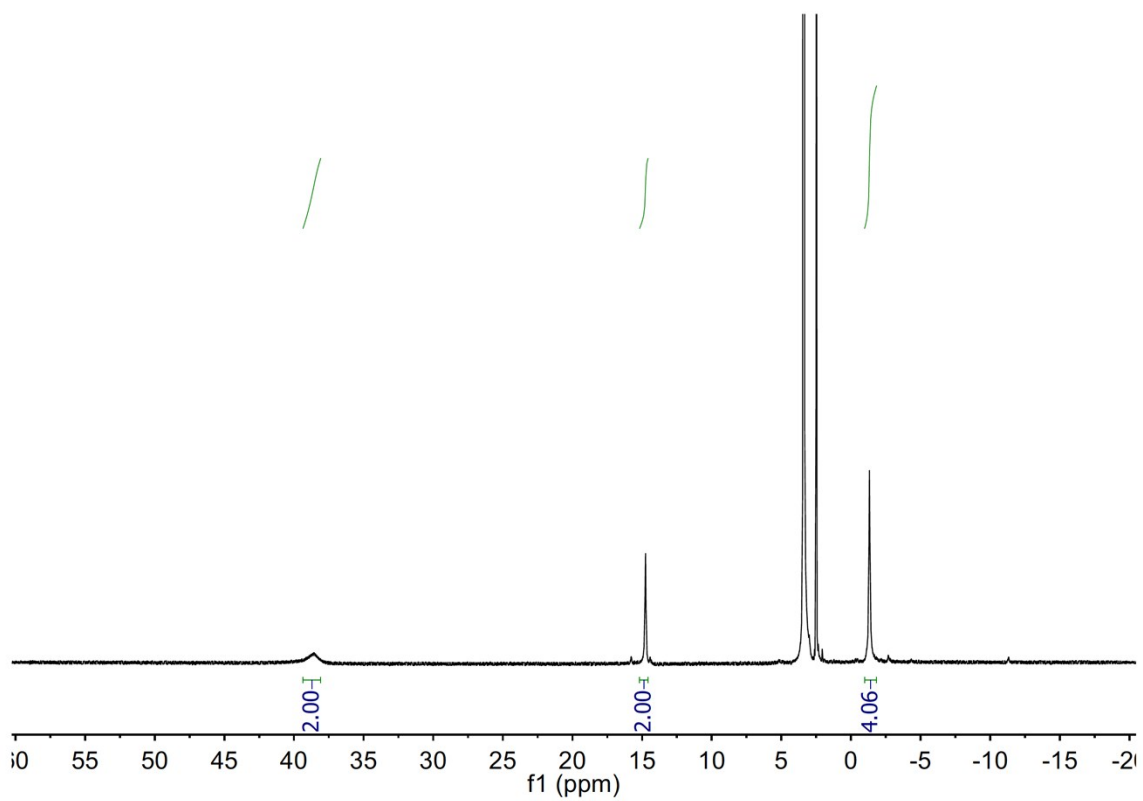

**Figure S10.**  $^1\text{H-NMR}$  spectrum of complex **5** in  $\text{DMSO-d}_6$  recorded at 500 MHz.

## UV Spectra of Complexes 5 and 6

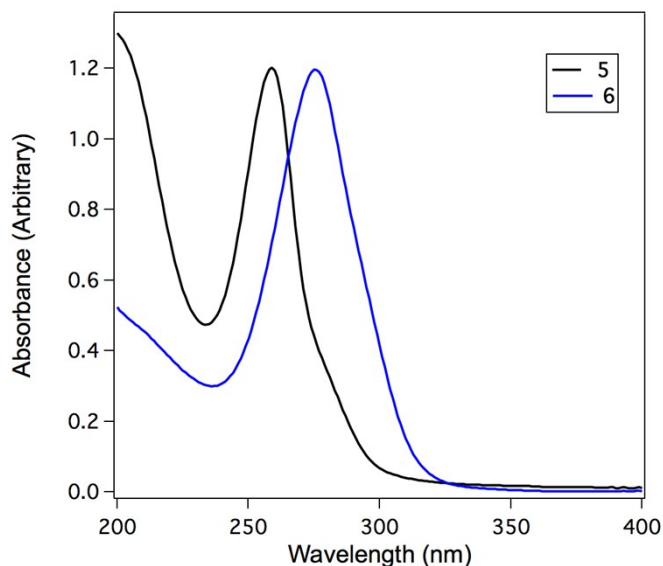

**Figure S11.** UV spectra for **5** ( $[\text{Cu}_3(\text{H}_2\text{L}^1)_3(\mu\text{-O})_3(\text{H}_2\text{O})_3](\text{NO}_3)_3$ ) and **6** ( $[\text{Ni}_3(\text{H}_2\text{L}^1)_3(\mu\text{-O})_3(\text{H}_2\text{O})_6]\text{Cl}_3$ ) in deionized  $\text{H}_2\text{O}$ .

## References

1. J. J. Manura, D. J. Manura. "Isotope Distribution Calculator and Mass Spec Plotter". Science Instrument Services. <http://www.sisweb.com/mstools/isotope.htm>. Accessed Jan. 20, 2016.
2. G. Tian, S. J. Teat, and L. Rao, *Dalton Trans.* 2013, **42**, 5690-5696.
3. S. O. Kang, S. Vukovic, R. Custelcean, B. P. Hay, *Ind. Eng. Chem. Res.* 2012, **51**, 6619-6624.
4. O. V. Dolomanov, L. J. Bourhis, R. J. Gildea, J. A. K. Howard, H. Puschmann, *H. J. Appl. Cryst.* 2009, **42**, 339-341.
5. Sheldrick, G. M. *Acta Cryst.* 2008, **A64**, 112-122.
6. L. J. Bourhis, O. V. Dolomanov, R. J. Gildea, J. A. K. Howard, H. Puschmann. *Acta Cryst.* 2015, **A71**, 59-75.
7. APEX2 Version 2014.9-0, Bruker AXS, Inc.; Madison, WI 2014.
8. SAINT Version 8.34a, Bruker AXS, Inc.; Madison, WI 2014.
9. Sheldrick, G. M. SADABS, Version 2014/5, Bruker AXS, Inc.; Madison, WI 2014.
10. Sheldrick, G. M. SHELXTL, Version 2014/7, Bruker AXS, Inc.; Madison, WI 2014.
